# Supplementary material for: Synthesis, Properties, and Applications of Nanocomposite Materials Based on Bacterial Cellulose and MXene
Source: MDPI journal article supplement (doi:10.3390/polym15204067), 2023-10-12
Supplement: s1 [file s1]

# Synthesis, Properties, and Applications of Nanocomposite Materials Based on Bacterial Cellulose and MXene

Aizhan B. Talipova <sup>1</sup>, Volodymyr V. Buranych <sup>2,3,\*</sup>, Irina S. Savitskaya <sup>1</sup>, Oleksandr V. Bondar <sup>2</sup>, Amanzhol Turlybekuly <sup>4,5</sup> and Alexander D. Pogrebnjak <sup>2,3,6,\*</sup>

<sup>1</sup> Department of Biotechnology, Al-Farabi Kazakh National University, Almaty 050040, Kazakhstan; talipova.aizhan@gmail.com (A.B.T.); irina.savickaya@kaznu.edu.kz (I.S.S.)

<sup>2</sup> Department of Nanoelectronics and Surface Modification, Sumy State University, 40000 Sumy, Ukraine; oleksandr.v.bondar@gmail.com

<sup>3</sup> Faculty of Materials Science and Technology in Trnava, Slovak University of Technology in Bratislava, 917 24 Trnava, Slovakia

<sup>4</sup> National Laboratory Astana, Nazarbayev University, Astana 010000, Kazakhstan; aturlybekuly@gmail.com

<sup>5</sup> Aman Technologies, LLP, Astana 010000, Kazakhstan

<sup>6</sup> Faculty of Mechanical Engineering, Lublin University of Technology, 20-618 Lublin, Poland

\* Correspondence: v.buranich@phe.sumdu.edu.ua (V.V.B.);

a.d.pogrebnjak@gmail.com (A.D.P.); Tel.: +421-918305994 (V.V.B.); +380-662-376-564 (A.D.P.)

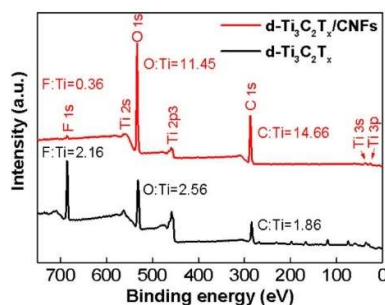

Figure S1. XPS survey spectrum of the pure d-Ti<sub>3</sub>C<sub>2</sub>T<sub>x</sub> paper and d-Ti<sub>3</sub>C<sub>2</sub>T<sub>x</sub>/CNF (50 wt %) composite paper [53].

53. Cao, W.-T.; Chen, F.-F.; Zhu, Y.-J.; Zhang, Y.-G.; Jiang, Y.-Y.; Ma, M.-G.; Chen, F. Binary Strengthening and Toughening of MXene/Cellulose Nanofiber Composite Paper with Nacre-Inspired Structure and Superior Electromagnetic Interference Shielding Properties. *ACS Nano* 2018, 12, 4583–4593, doi:10.1021/acsnano.8b00997.
